# Supplementary material
Source: Elsevier journal article supplement (https://www.sciencedirect.com/science/article/pii/S169540332030223X)
Supplement: mmc1 [file S169540332030223X:mmc1.pdf]

## EARLY FEEDING SKILLS ASSESSMENT – Versión en español (EFSA-VE)

Momento previo a la  
alimentación:

|                     |          |          |
|---------------------|----------|----------|
| Saturación O2 base: | FR base: | FC base: |
|---------------------|----------|----------|

| Disposición (inmediatamente previa a la toma)                     |                                                                                                  |                                                  |                                                              |
|-------------------------------------------------------------------|--------------------------------------------------------------------------------------------------|--------------------------------------------------|--------------------------------------------------------------|
| <b>Motor</b>                                                      | Cuerpo en posición flexora con brazos en línea media (con o sin ayuda) durante la valoración     | Pierde la posición flexora al tomarlo en brazos  | No hay posición flexora. Brazos caídos durante la valoración |
| <b>Alerta</b>                                                     | Despierto                                                                                        | Adormilado                                       | Dormido                                                      |
| <b>Comportamiento oromotor cuando se ofrece una tetina o dedo</b> | Abre la boca y protruye la lengua activamente para recibir la tetina cuando esta toca los labios | Abre la boca pero no busca activamente la tetina | No abre la boca cuando la tetina toca los labios             |

| Evaluación de las habilidades tempranas para la alimentación - Early Feeding Skills Assessment (EFS)                                     |                                                           |                                                                     |                                                                                          |
|------------------------------------------------------------------------------------------------------------------------------------------|-----------------------------------------------------------|---------------------------------------------------------------------|------------------------------------------------------------------------------------------|
| Regulación respiratoria                                                                                                                  | 3                                                         | 2                                                                   | 1                                                                                        |
| 1. Cada vez que recibe la tetina, la transición a la succión se produce sin inestabilidad conductural o cardiorrespiratoria <sup>a</sup> | Estable y consistente                                     | Inestabilidad en al menos una transición                            | Inestabilidad en la mayoría de las transiciones                                          |
| 2. La duración temporal de los racimos de succión se mantienen estables                                                                  | Consistente                                               | Ocasionalmente hace racimos muy amplios antes de parar a respirar   | Frecuentemente hace racimos muy amplios antes de parar a respirar                        |
| 3. Integra la respiración en la secuencia de racimos de succión                                                                          | Consistente                                               | Intenta añadir respiraciones, pero no está completamente integrado  | No añade, o rara vez, respiraciones en el racimo de succión                              |
| 4. Organiza racimos amplios (+7 succiones) sin signos de inestabilidad conductual o cardiorrespiratorios                                 | Consistente en hacer racimos amplios y mantenerse estable | Ocasionalmente hace racimos amplios que provocan inestabilidad      | Frecuentemente hace racimos amplios que provocan inestabilidad O no hace racimos amplios |
| 5. Aumenta el trabajo respiratorio <sup>b</sup>                                                                                          | Nunca o rara vez                                          | Ocasionalmente                                                      | Frecuentemente                                                                           |
| Función oromotora                                                                                                                        | 3                                                         | 2                                                                   | 1                                                                                        |
| 6. Abre la boca activamente y protruye la lengua para recibir la tetina cuando esta toca los labios                                      | Consistente                                               | Inconsistente                                                       | Nunca                                                                                    |
| 7. La succión se presenta inmediata al recibir la tetina                                                                                 | Consistente                                               | Inconsistente                                                       | Nunca o rara vez                                                                         |
| 8. La succión es estable y fuerte                                                                                                        | Consistente                                               | Ocasionalmente hay compresión solo cuando succiona                  | Frecuentemente hay compresión solo cuando succiona                                       |
| 9. Pérdida de leche en los labios                                                                                                        | No o rara vez                                             | Ocasional                                                           | Frecuentemente                                                                           |
| Coordinación con la deglución                                                                                                            | 3                                                         | 2                                                                   | 1                                                                                        |
| 10. Sonido de gorgoteo creado por fluido en nariz o faringe                                                                              | No o rara vez                                             | Ocasional                                                           | Frecuente                                                                                |
| 11. Trago con sonido o deglución forzada                                                                                                 | No o rara vez                                             | Ocasional                                                           | Frecuente                                                                                |
| 12. Sonido agudo "aullido" en la transición de la deglución a la respiración                                                             | No o rara vez                                             | Ocasional                                                           | Frecuente                                                                                |
| 13. Tos o atragantamiento                                                                                                                | Nunca                                                     | Un evento observado                                                 | Más de un evento observado                                                               |
| Compromiso en la toma                                                                                                                    | 3                                                         | 2                                                                   | 1                                                                                        |
| 14. Alerta                                                                                                                               | Despierto                                                 | Se adormece al final de la toma                                     | Se adormece al inicio de la toma                                                         |
| 15. Energía <sup>c</sup>                                                                                                                 | Mantiene tono y energía                                   | Perdida tardía de tono/energía                                      | Perdida temprana de tono/energía                                                         |
| Estabilidad fisiológica                                                                                                                  | 3                                                         | 2                                                                   | 1                                                                                        |
| 16. Estrés <sup>d</sup>                                                                                                                  | No o rara vez                                             | Ocasional                                                           | Frecuentemente                                                                           |
| 17. Cambio de color                                                                                                                      | No cambia el color                                        | Ocasionalmente cambia de color                                      | Frecuentemente o de forma prolongada cambia de color                                     |
| 18. Saturación de oxígeno estable                                                                                                        | Estable, similar a momento previo de la alimentación      | Ocasionalmente cae por debajo de los estándares clínicos            | Frecuentemente cae por debajo de los estándares clínicos                                 |
| 19. Frecuencia cardíaca estable                                                                                                          | Estable, similar a momento previo de la alimentación      | Ocasionalmente sube o cae un 20% del valor previo a la alimentación | Frecuentemente sube o cae un 20% del valor previo a la alimentación                      |

<sup>a</sup>Se evidencia la inestabilidad de forma conductual (elevación de la ceja, aleteo de los párpados, ceño fruncido, mirada preocupada, se aleja de la tetina, extiende dedos o brazos, empuja la tetina) o por señales fisiológicas (apnea, desaturación, caída de frecuencia cardíaca).

<sup>b</sup>El trabajo respiratorio se evidencia por aleteo nasal y/o palidez en narinas, tirones de la barbilla/extensión del cuello/sacudir la cabeza, retracciones supraesternal, sonido de gruñido/prolongación de la exhalación, o el uso de músculos respiratorios accesorios.

<sup>c</sup>La energía se expresa mediante el tono motor, el control postural, la posición de las extremidades en la línea media y la flexión.

<sup>d</sup>Levantamiento de cejas, aleteo de párpados, ceño fruncido, mirada preocupada, se aleja de la tetina, extiende los dedos o brazos, empuja la tetina.

| Recuperación post-toma |                                                                        |                                                                      |                                                                  |
|------------------------|------------------------------------------------------------------------|----------------------------------------------------------------------|------------------------------------------------------------------|
| Estado                 | Alerta tranquila                                                       | Dormido o adormilado                                                 | Intranquilo                                                      |
| Nivel de alerta        | Cuerpo en posición flexora con brazos en línea media (con o sin ayuda) | Periodo de tono muscular disminuido; recupera tras un corto descanso | Agotamiento después de la alimentación, pérdida de tono/flacidez |

### Condiciones en la alimentación:

Habilidades en la alimentación: \_\_\_\_ mantiene durante la toma \_\_\_\_ mejora durante la toma \_\_\_\_ disminuyen durante la toma

Cantidad de oxígeno suplementario previo a la toma: \_\_\_\_ Cantidad de oxígeno suplementario durante la toma: \_\_\_\_

Alimentado con sonda nasogástrica/orogástrica: SÍ/NO Tipo de biberón/tetina usada: \_\_\_\_

Tiempo de alimentación en minutos: \_\_\_\_ Volumen consumido: \_\_\_\_ ml

Posición: acunado \_\_\_\_ semielevado lateral \_\_\_\_ semielevado de frente \_\_\_\_ otro \_\_\_\_

### Recomendaciones para próxima alimentación:

**Puntuación EFS:** cada subescala se puntúa individualmente. Cada ítem puede puntuar 1, 2 o 3, donde 1 representa la habilidad mínima o la frecuencia alta de necesidades (columna de la derecha) y 3 representa la habilidad madura o la ausencia de necesidades (columna de la izquierda). Los puntajes 2 indican habilidades que están surgiendo / observadas ocasionalmente o necesidades que se observan ocasionalmente. Anote puntajes totales y una "X" en el cuadro apropiado a la derecha del puntaje total para cada subescala.

|                                               | Puntuación total | Ítems que puntúan 3<br>Habilidad observada consistentemente | Ítems que puntúan 2<br>Habilidad emergente y/o necesidad | Al menos un ítem puntúa 1<br>Habilidad no evidente y/o necesidad significativa |
|-----------------------------------------------|------------------|-------------------------------------------------------------|----------------------------------------------------------|--------------------------------------------------------------------------------|
| Regulación respiratoria<br>(Rango 5-15)       |                  |                                                             |                                                          |                                                                                |
| Función oromotora<br>(Rango 4-12)             |                  |                                                             |                                                          |                                                                                |
| Coordinación con la deglución<br>(Rango 4-12) |                  |                                                             |                                                          |                                                                                |
| Compromiso en la toma<br>(Rango 2-6)          |                  |                                                             |                                                          |                                                                                |
| Estabilidad fisiológica<br>(Rango 4-12)       |                  |                                                             |                                                          |                                                                                |
| Puntuación total EFS<br>(Rango 19-57)         |                  |                                                             |                                                          |                                                                                |
